# Supplementary material for: N-Alkylation of Anthracycline Antibiotics by Natural Sesquiterpene Lactones as a Way to Obtain Antitumor Agents with Reduced Side Effects
Source: MDPI journal article supplement (doi:10.3390/biomedicines9050547), 2021-05-13

## **N-alkylation of anthracycline antibiotics by natural sesquiterpene lactones as a way to obtain antitumor agents with reduced side effects**

**Margarita Neganova<sup>1</sup>, Alexey Semakov<sup>1</sup>, Yulia Aleksandrova<sup>1</sup>, Ekaterina Yandulova<sup>1</sup>, Sergey Pukhov<sup>1</sup>, Lada Anikina<sup>1</sup> and Sergey Klochkov<sup>1\*</sup>**

<sup>1</sup> Institute of Physiologically Active Compounds of Russian Academy of Sciences, 142432, Chernogolovka, Russia; [klochkov@ipac.ac.ru](mailto:klochkov@ipac.ac.ru) (S.K.); [l\\_vok@list.ru](mailto:l_vok@list.ru) (A.S.); [yulia.aleks.97@mail.ru](mailto:yulia.aleks.97@mail.ru) (Yu.A.); [yandulovacaterina@gmail.com](mailto:yandulovacaterina@gmail.com) (E.Ya.); [pukhov.sergey@gmail.com](mailto:pukhov.sergey@gmail.com) (S.P.); [neganova83@mail.ru](mailto:neganova83@mail.ru) (M.N.)

\* Correspondence: [klochkov@ipac.ac.ru](mailto:klochkov@ipac.ac.ru); Tel.: +7-(496)5242525

<sup>1</sup>H and <sup>13</sup>C NMR spectra were recorded on Bruker AVANCE III instruments (operating frequency 500.13 and 125.78 MHz) in CDCl<sub>3</sub>, internal standard is the residual solvent signal, subscripts “alpha” and “beta” denote nonequivalent protons at one carbon atom. To refine the multiplicity in the proton spectra analysis, we used the multiplication by the TRAF function. For some weakly intense <sup>13</sup>C spectra, the Convolution difference was used to increase the signal-to-noise ratio.

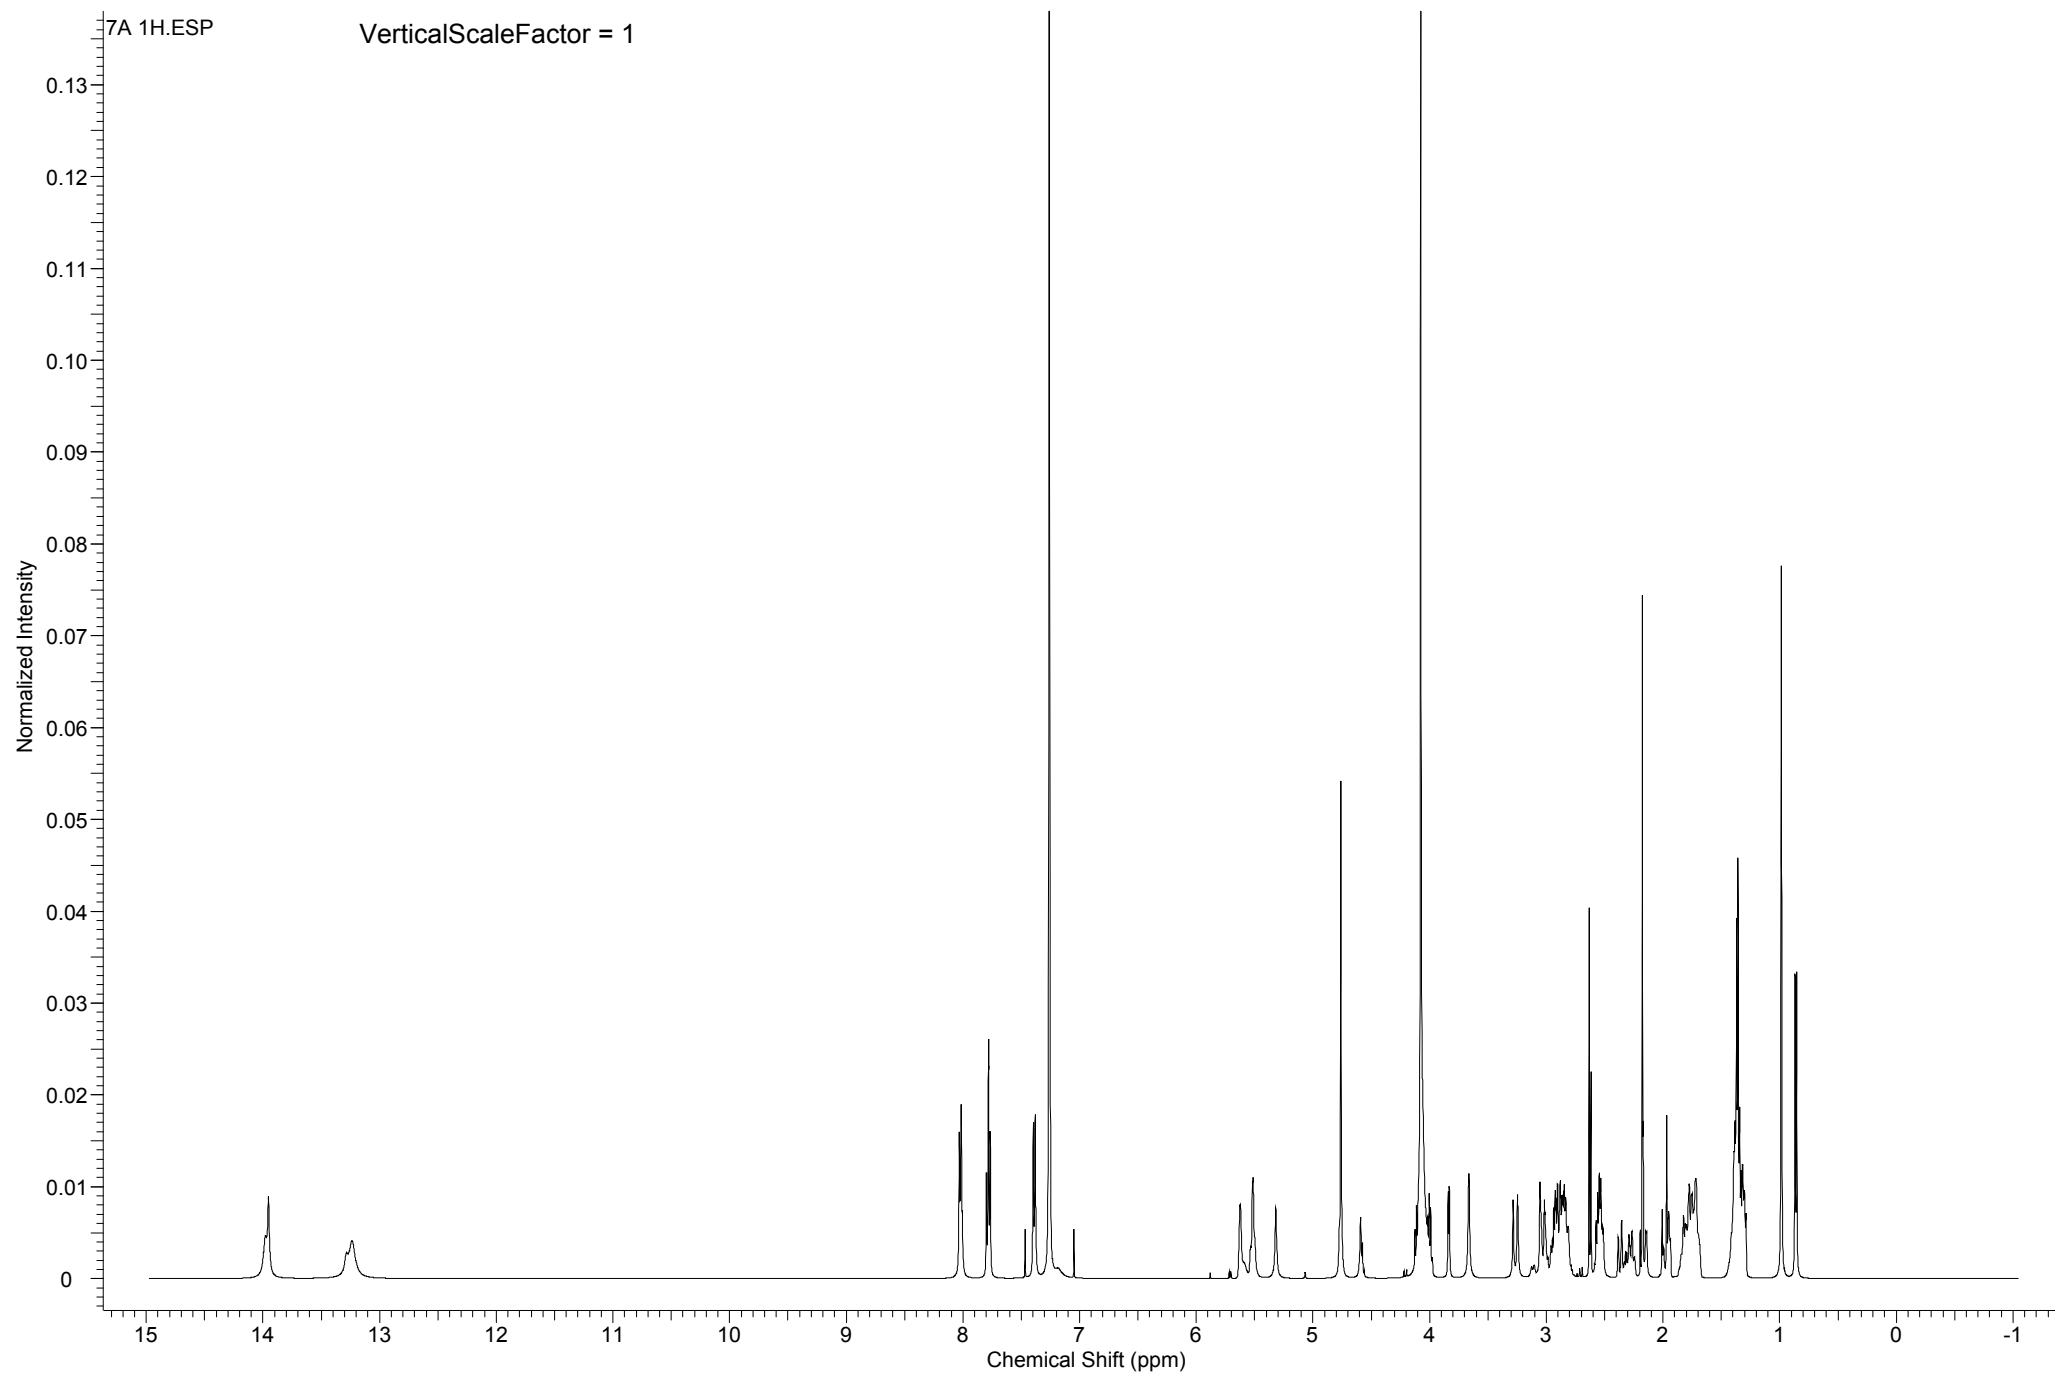

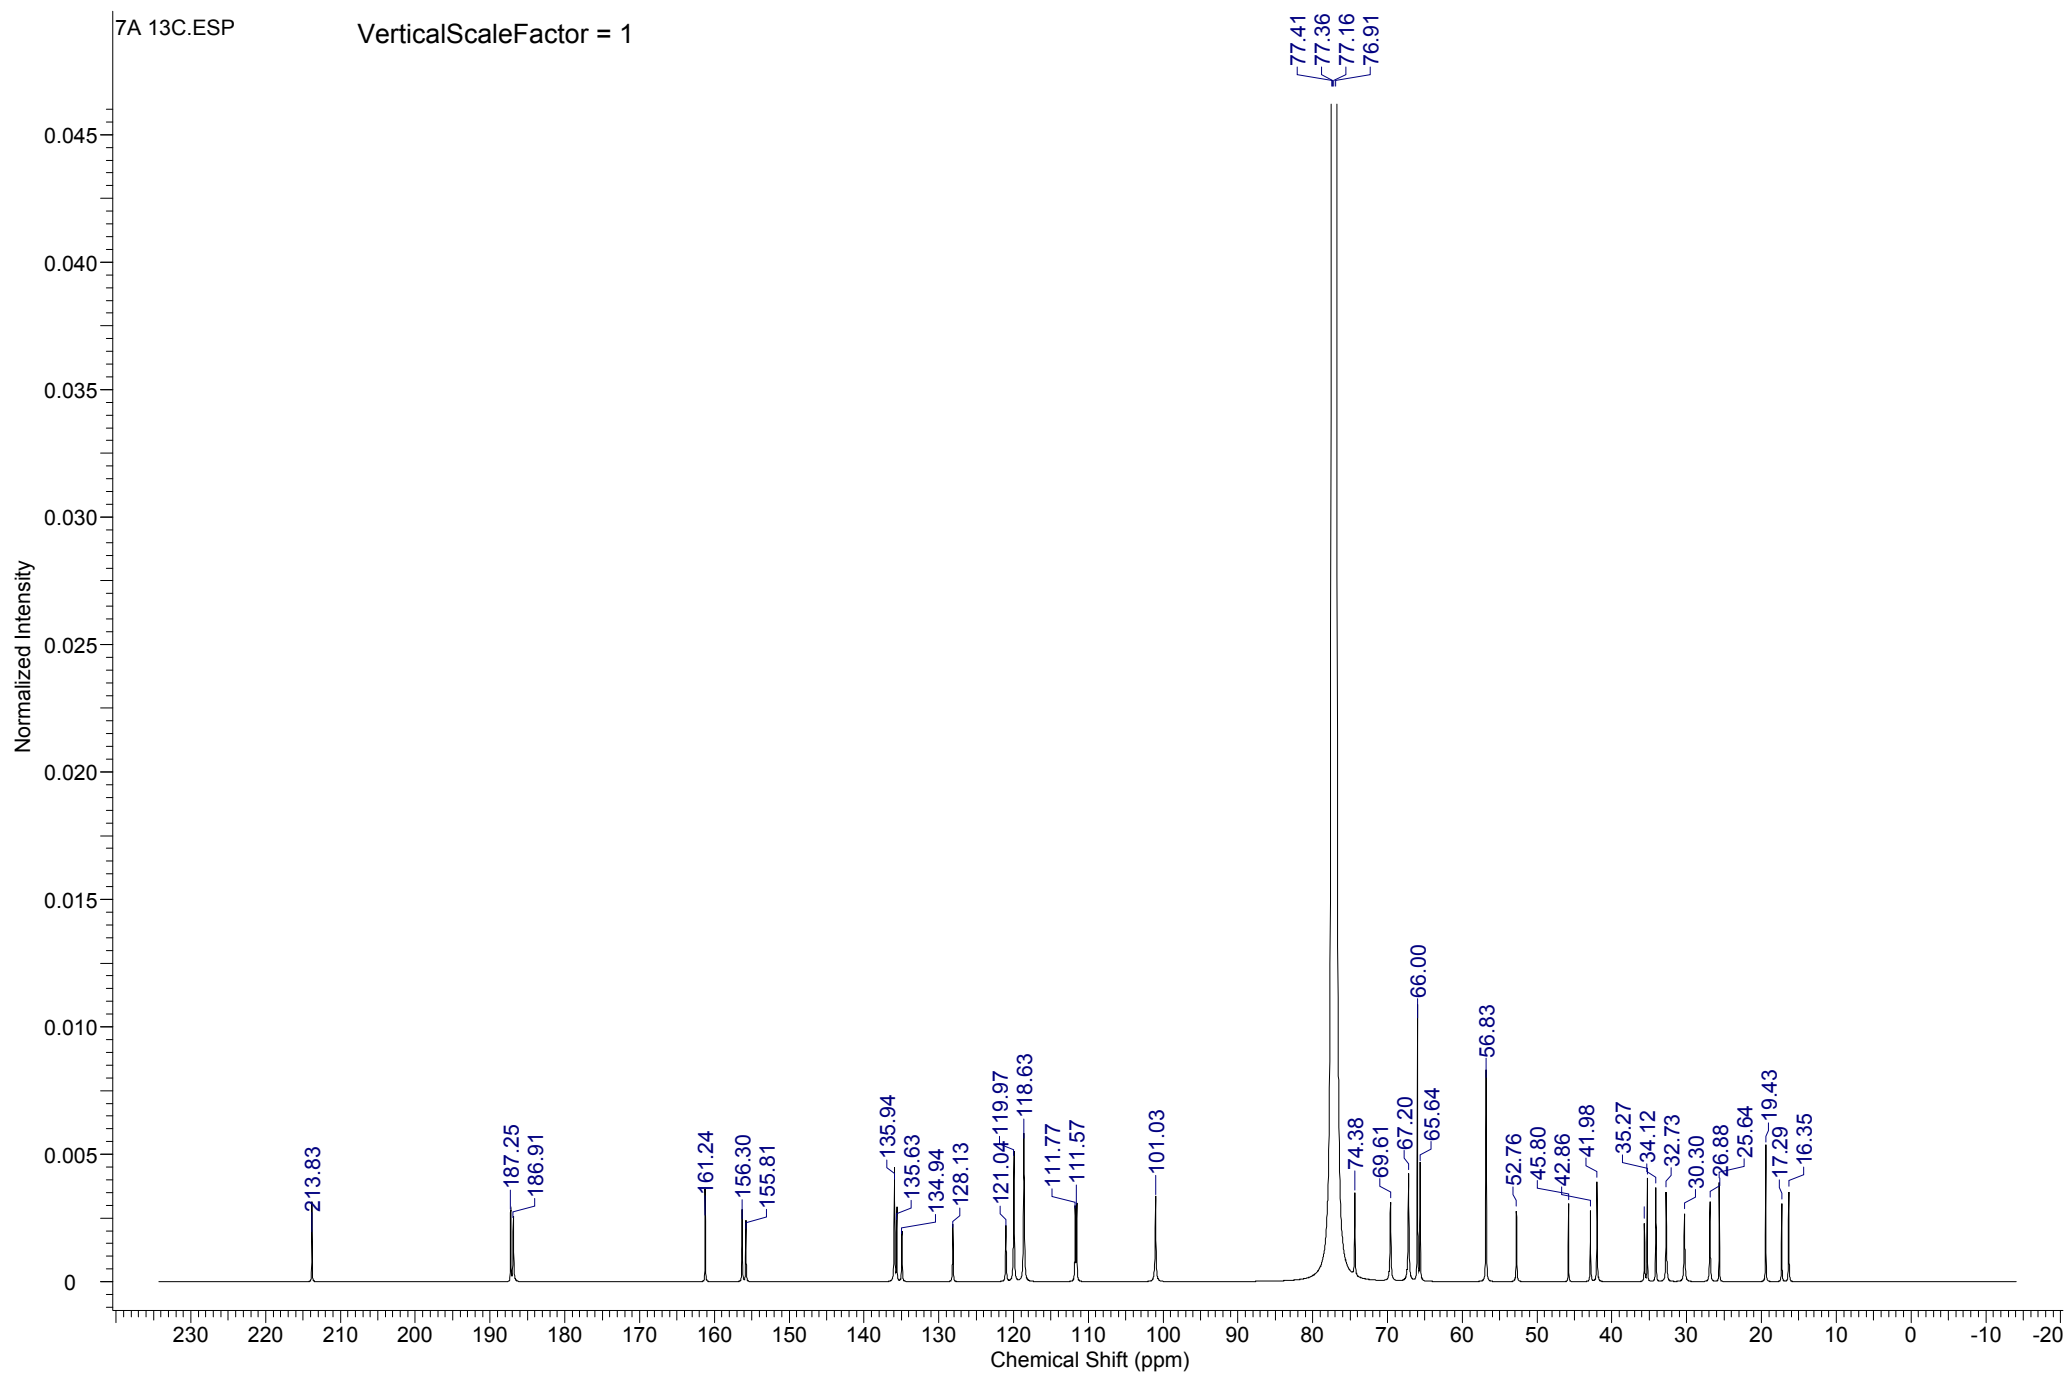

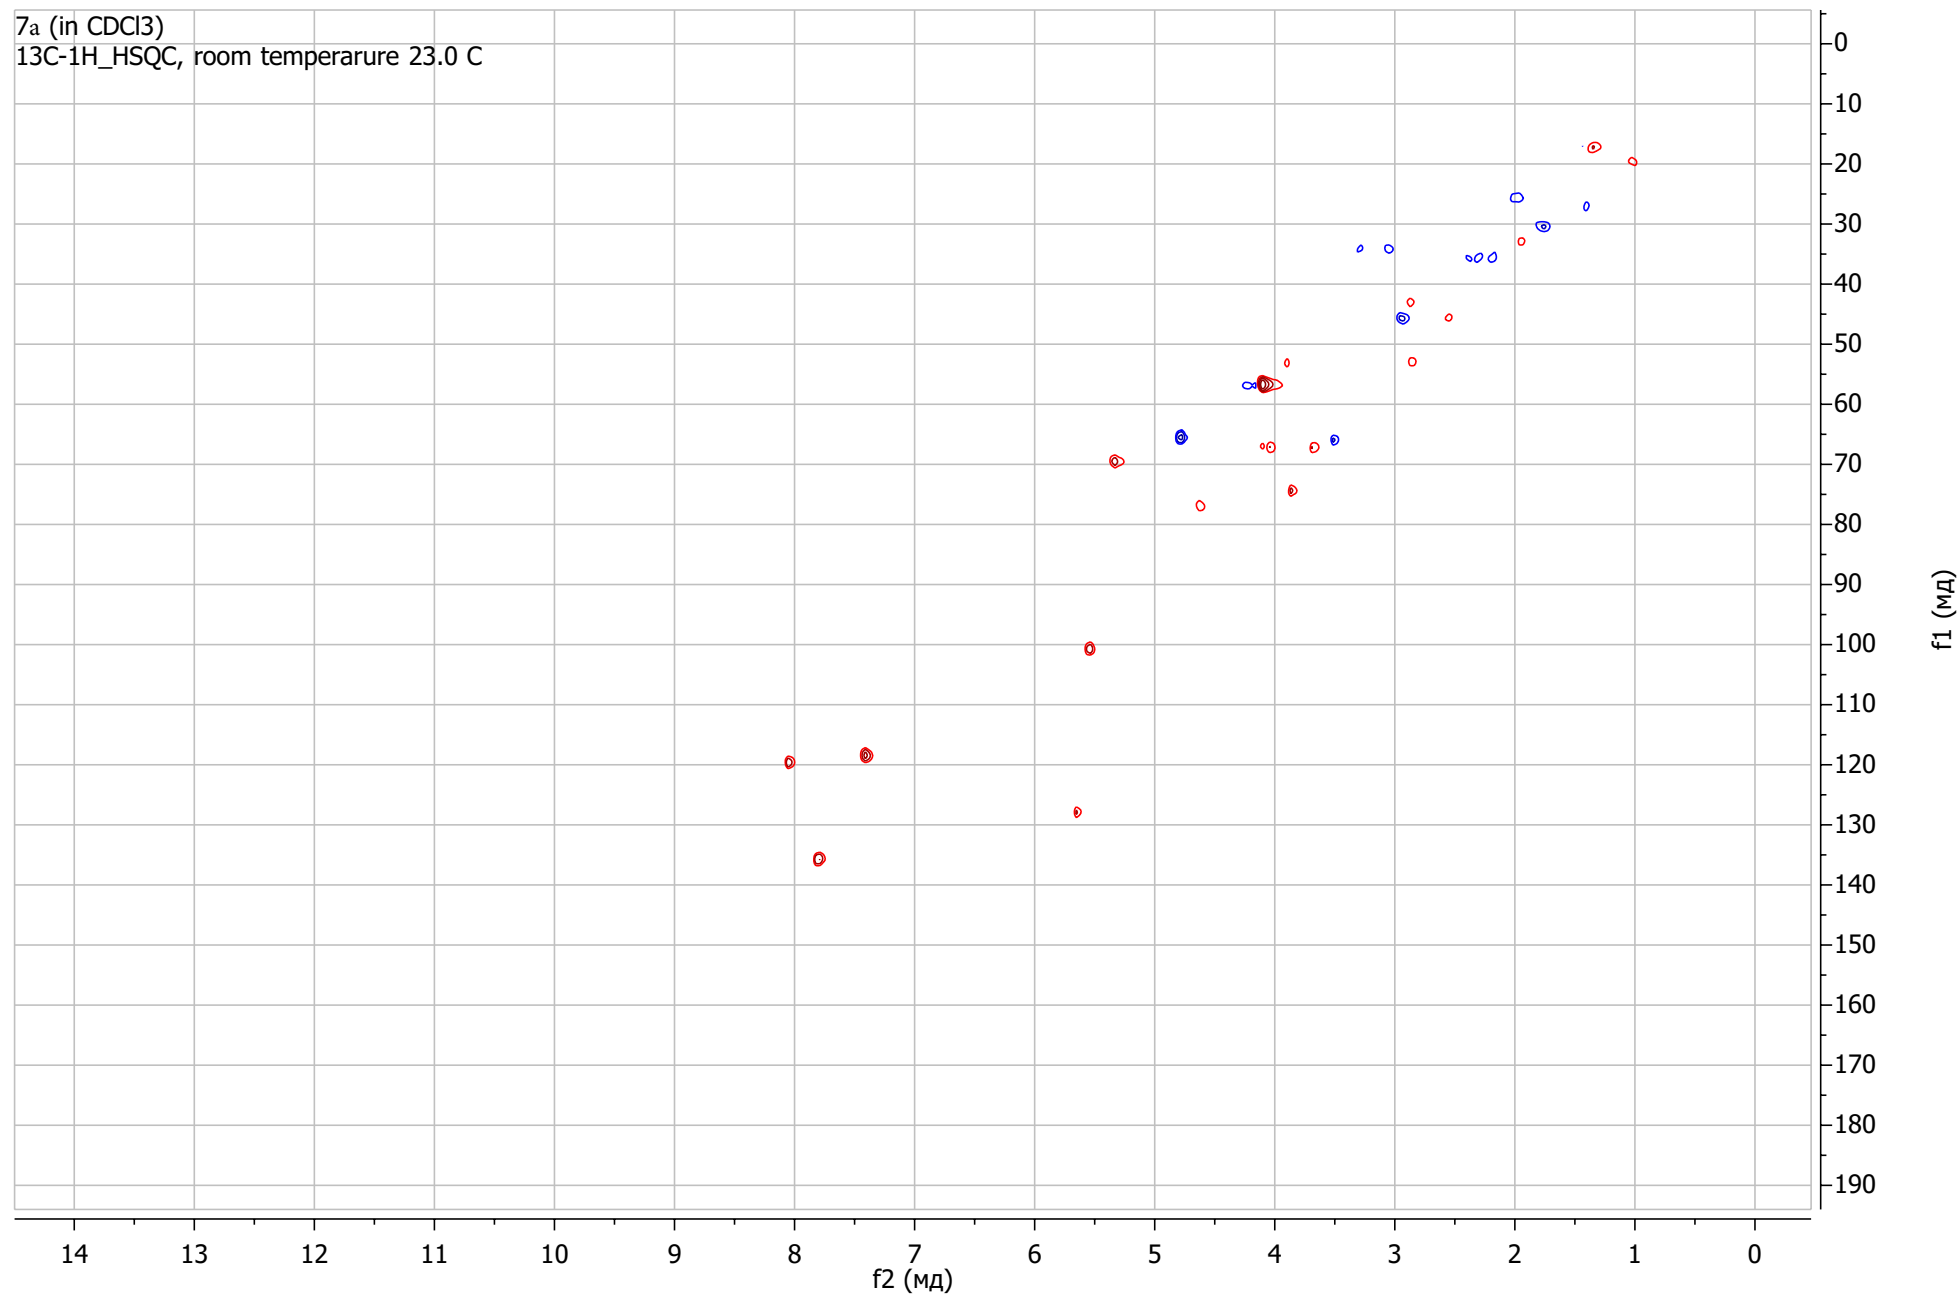

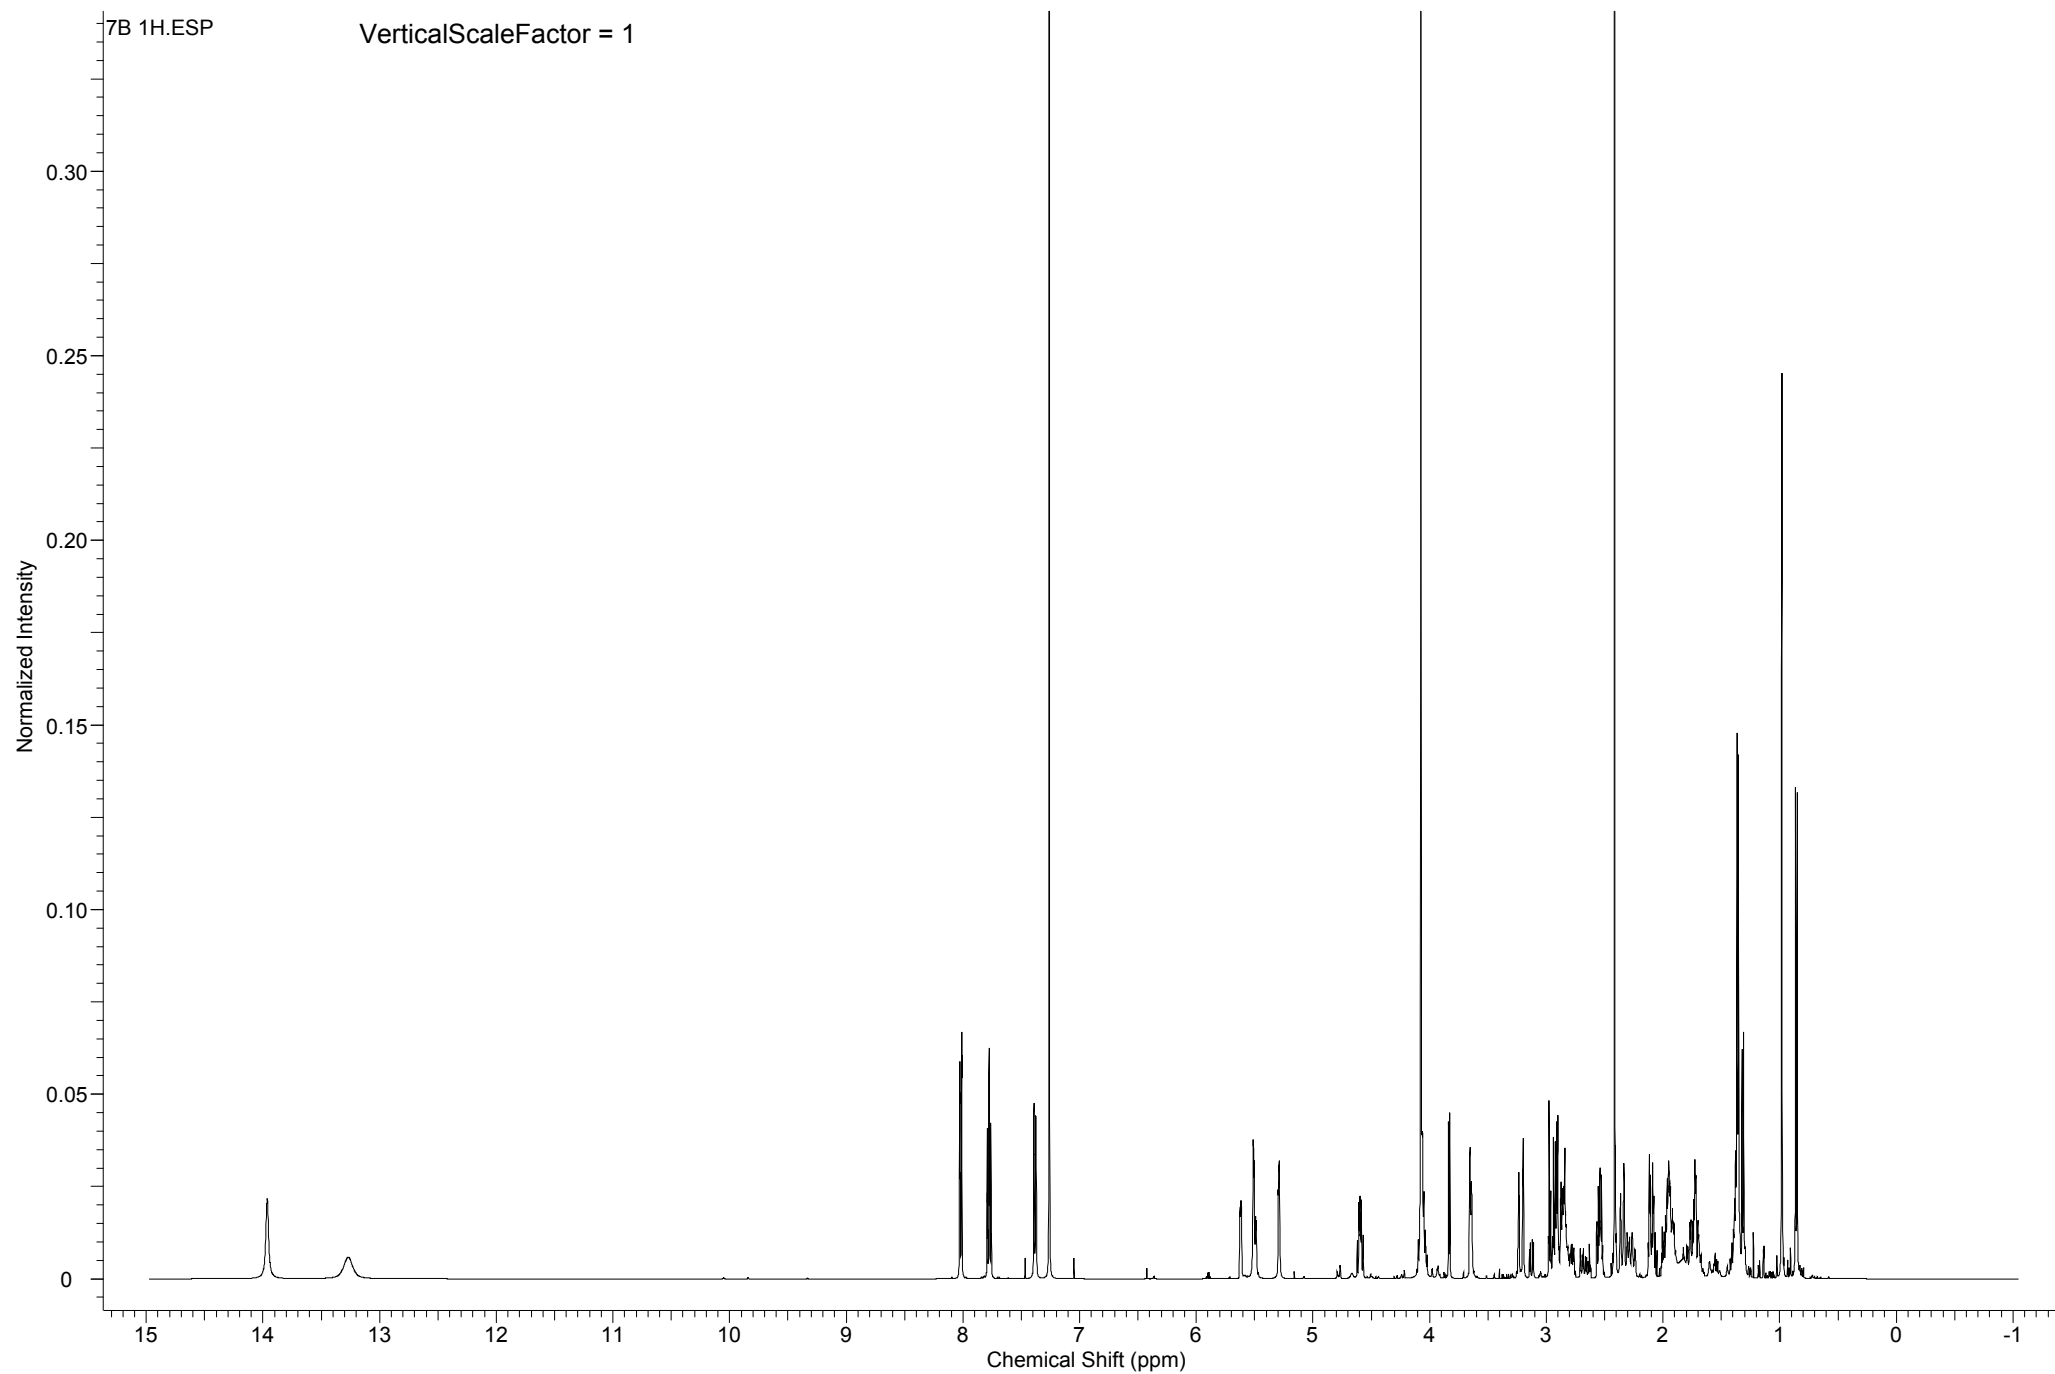

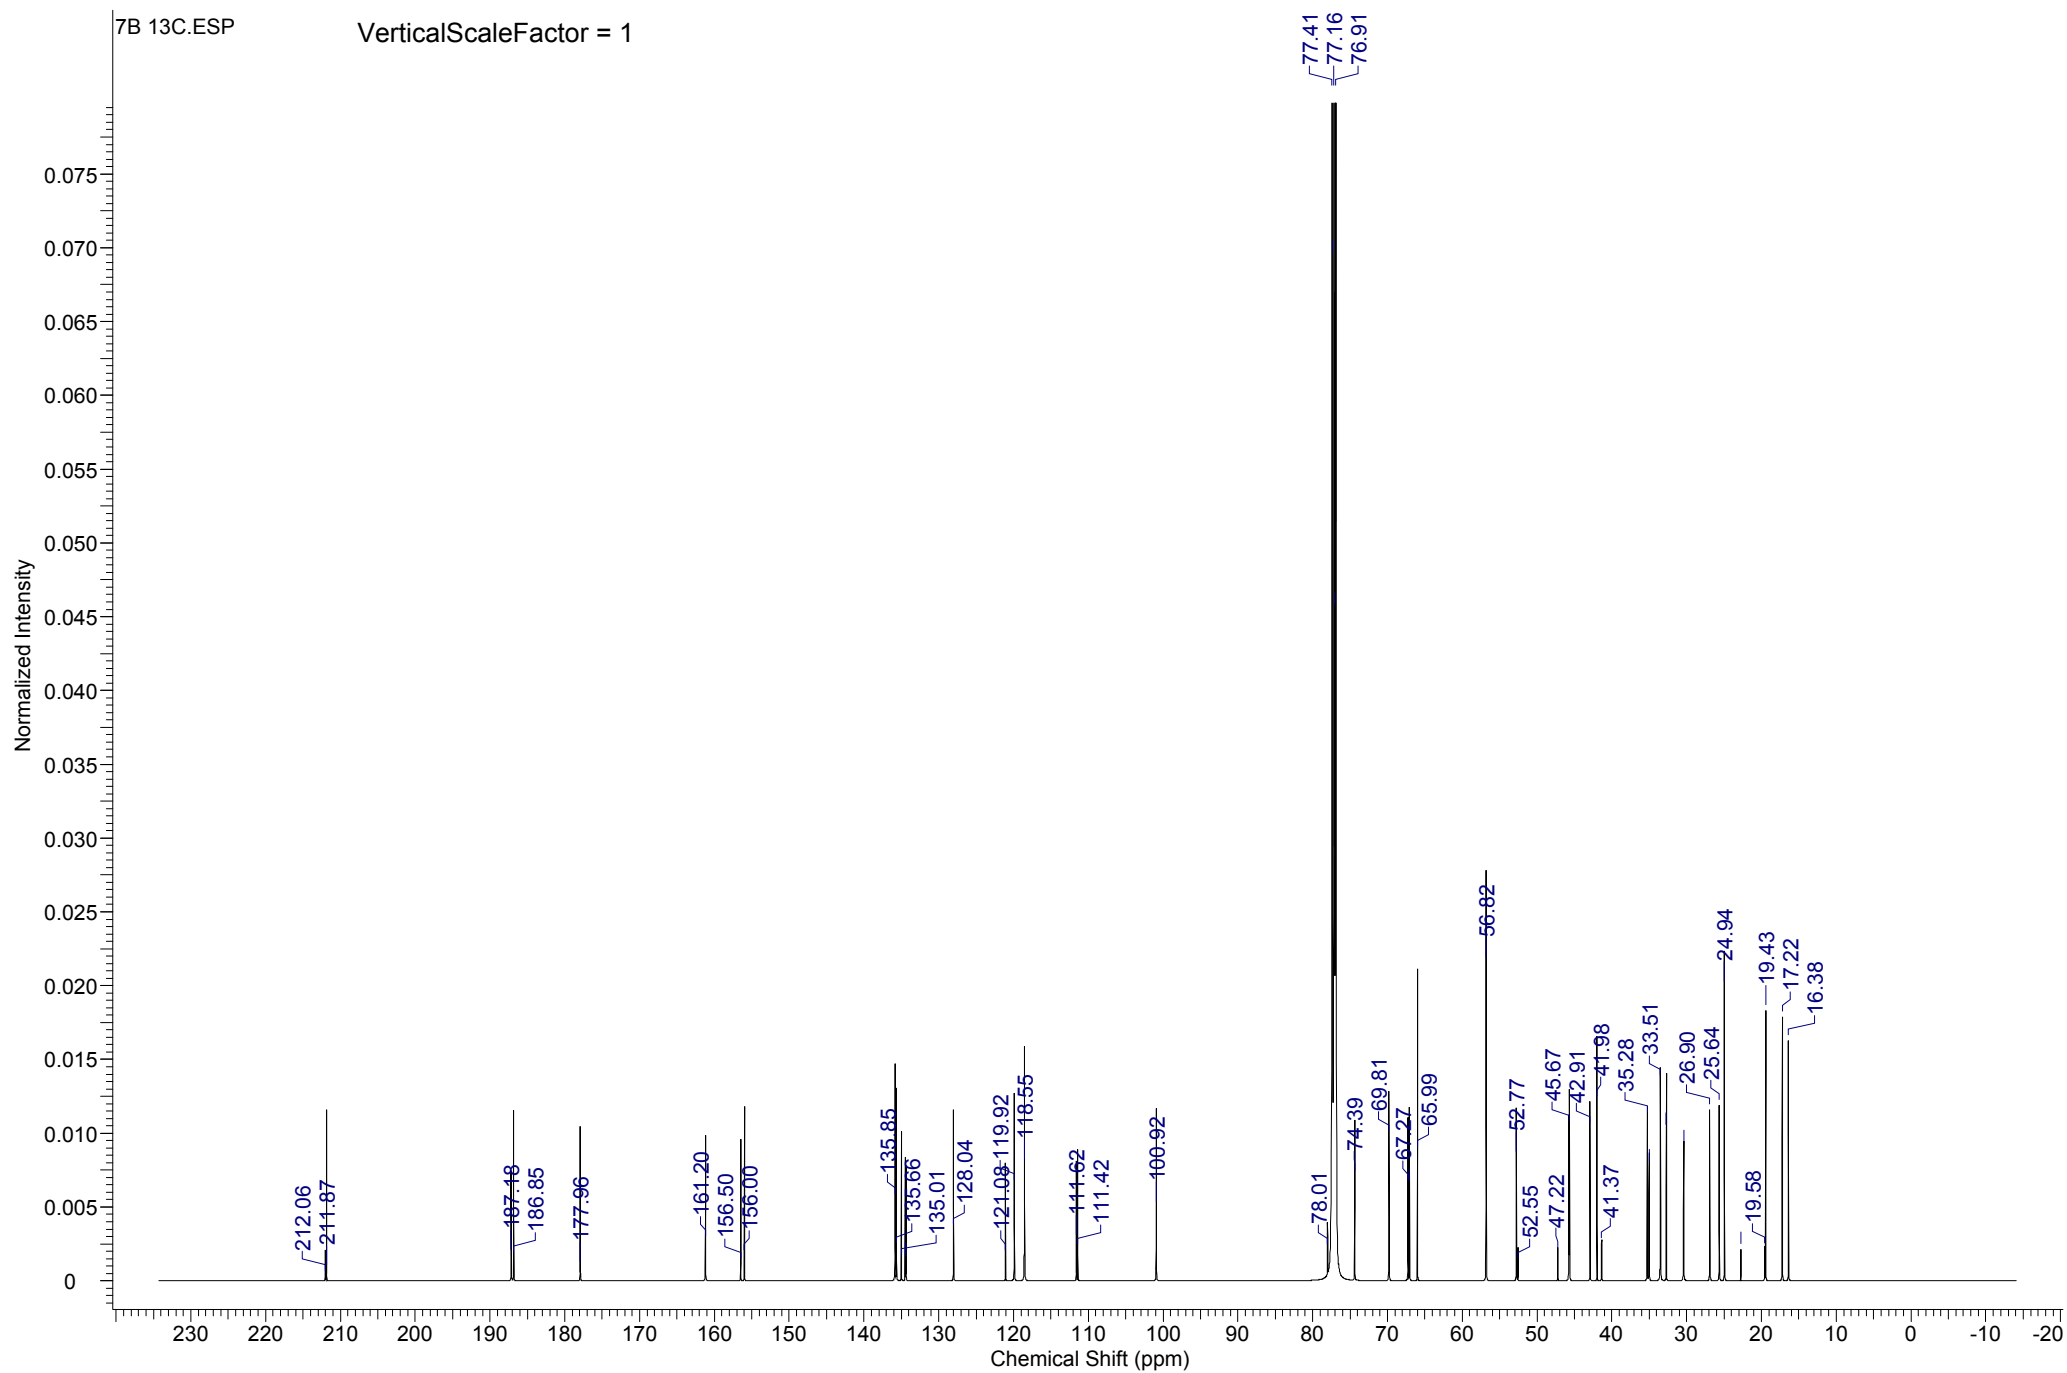

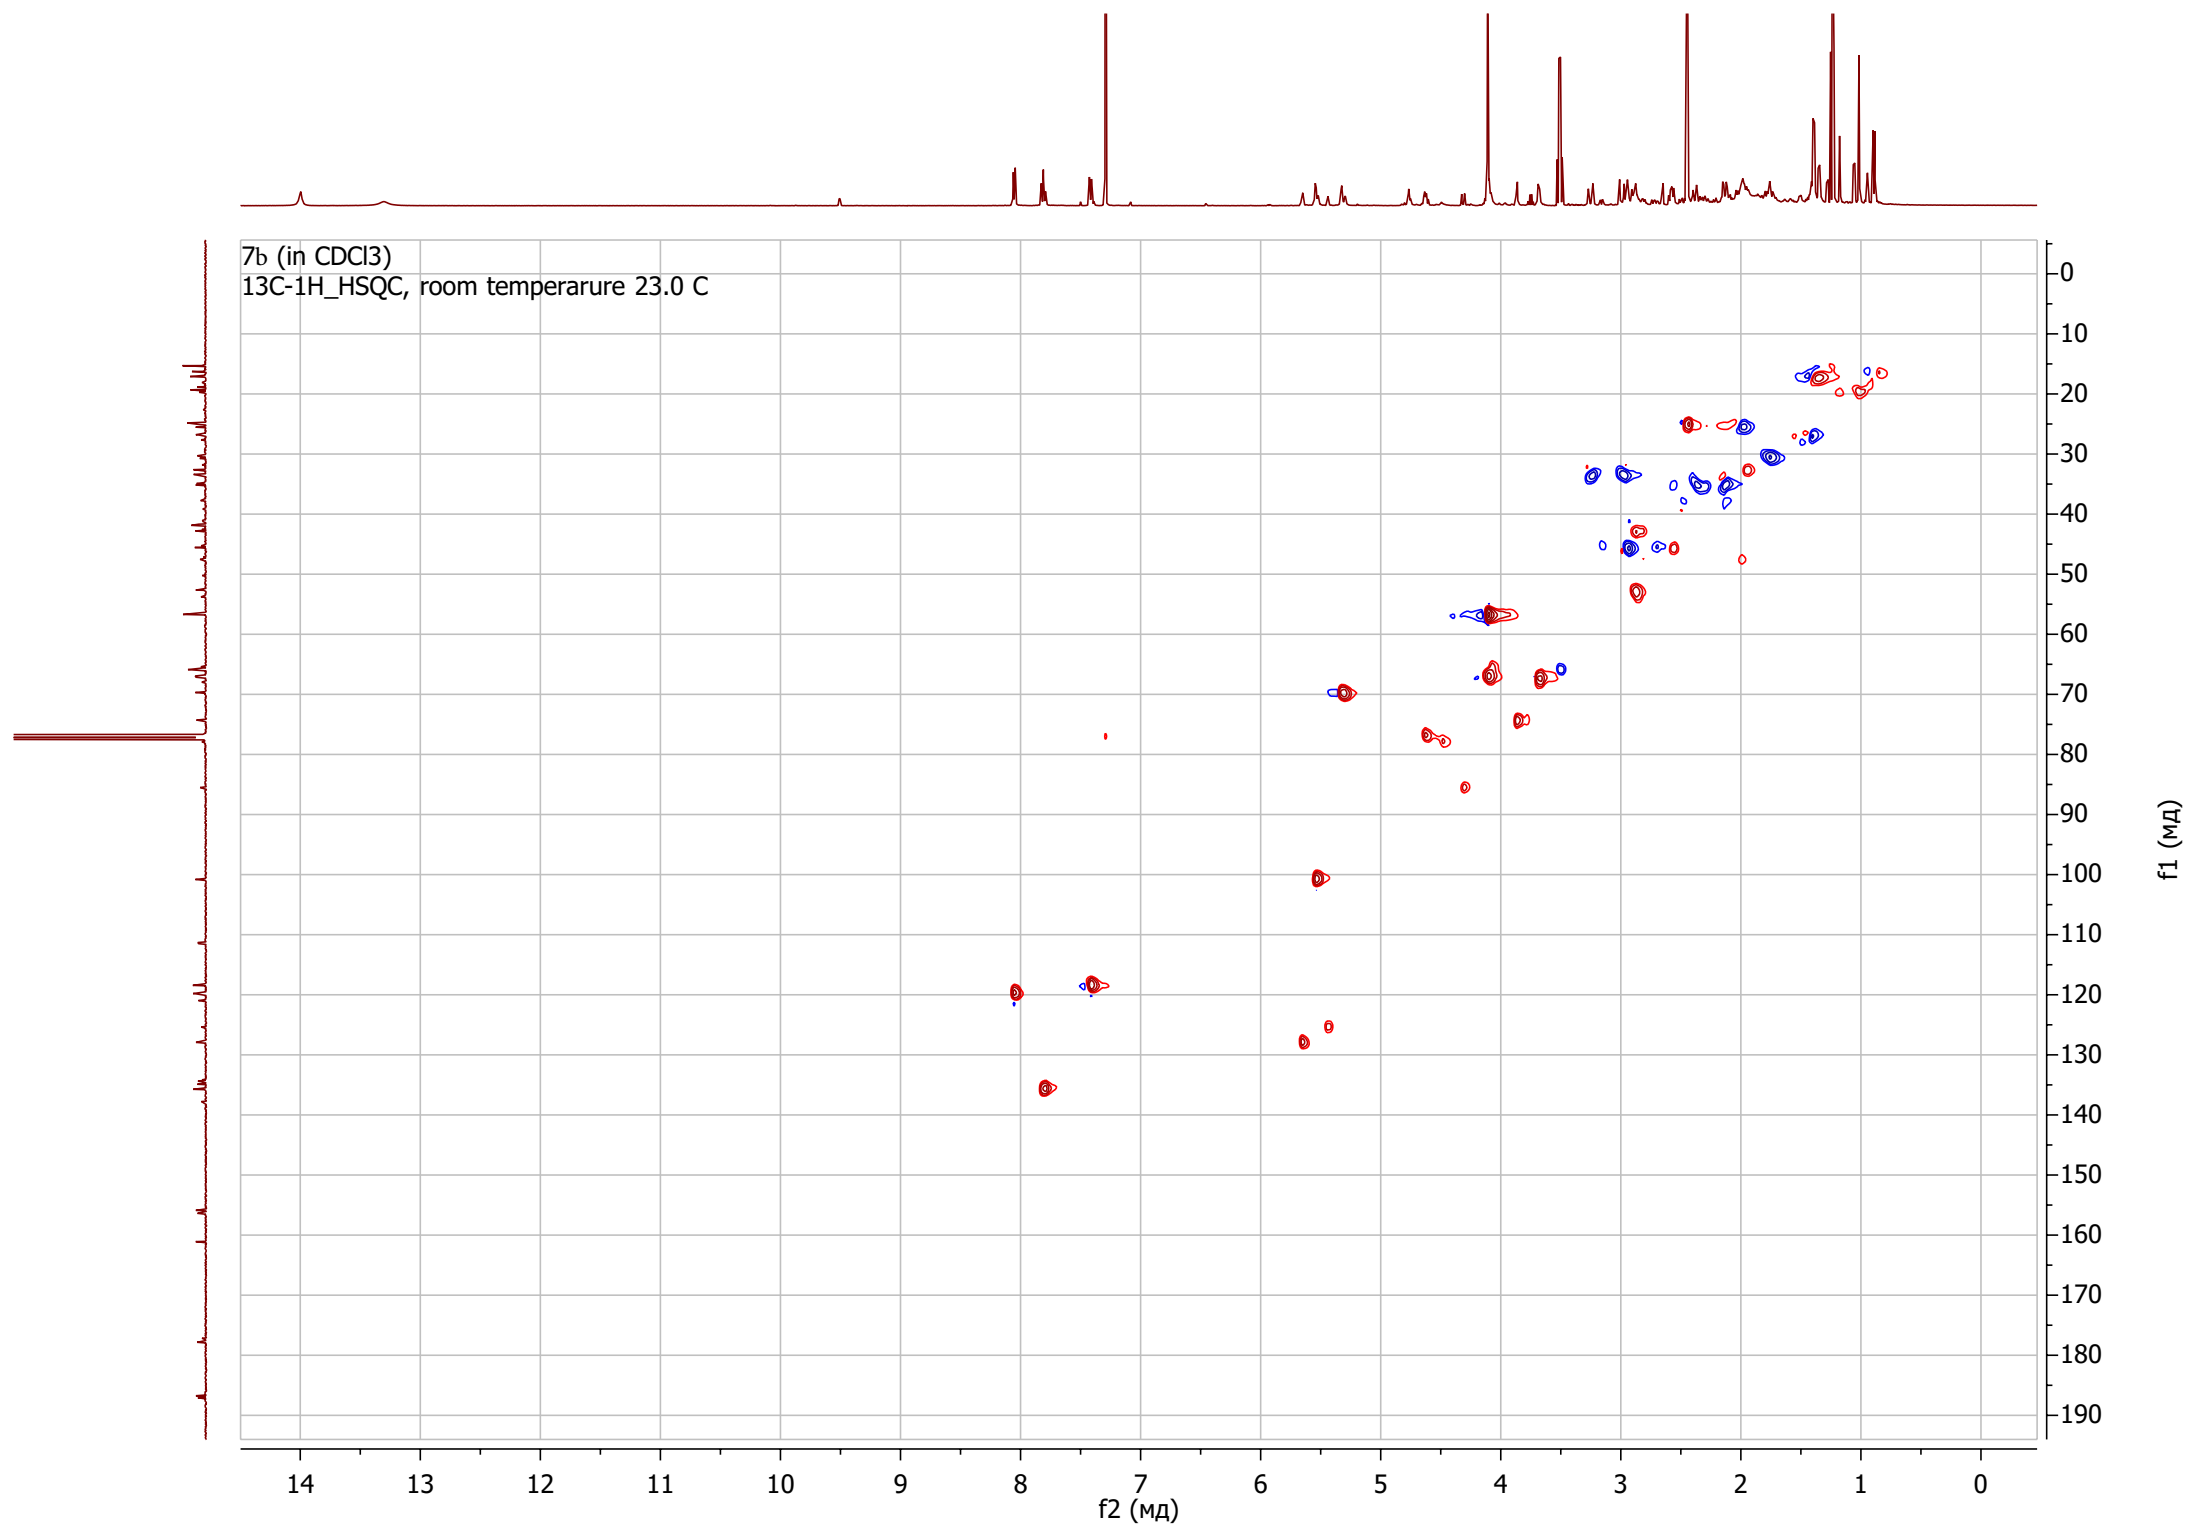

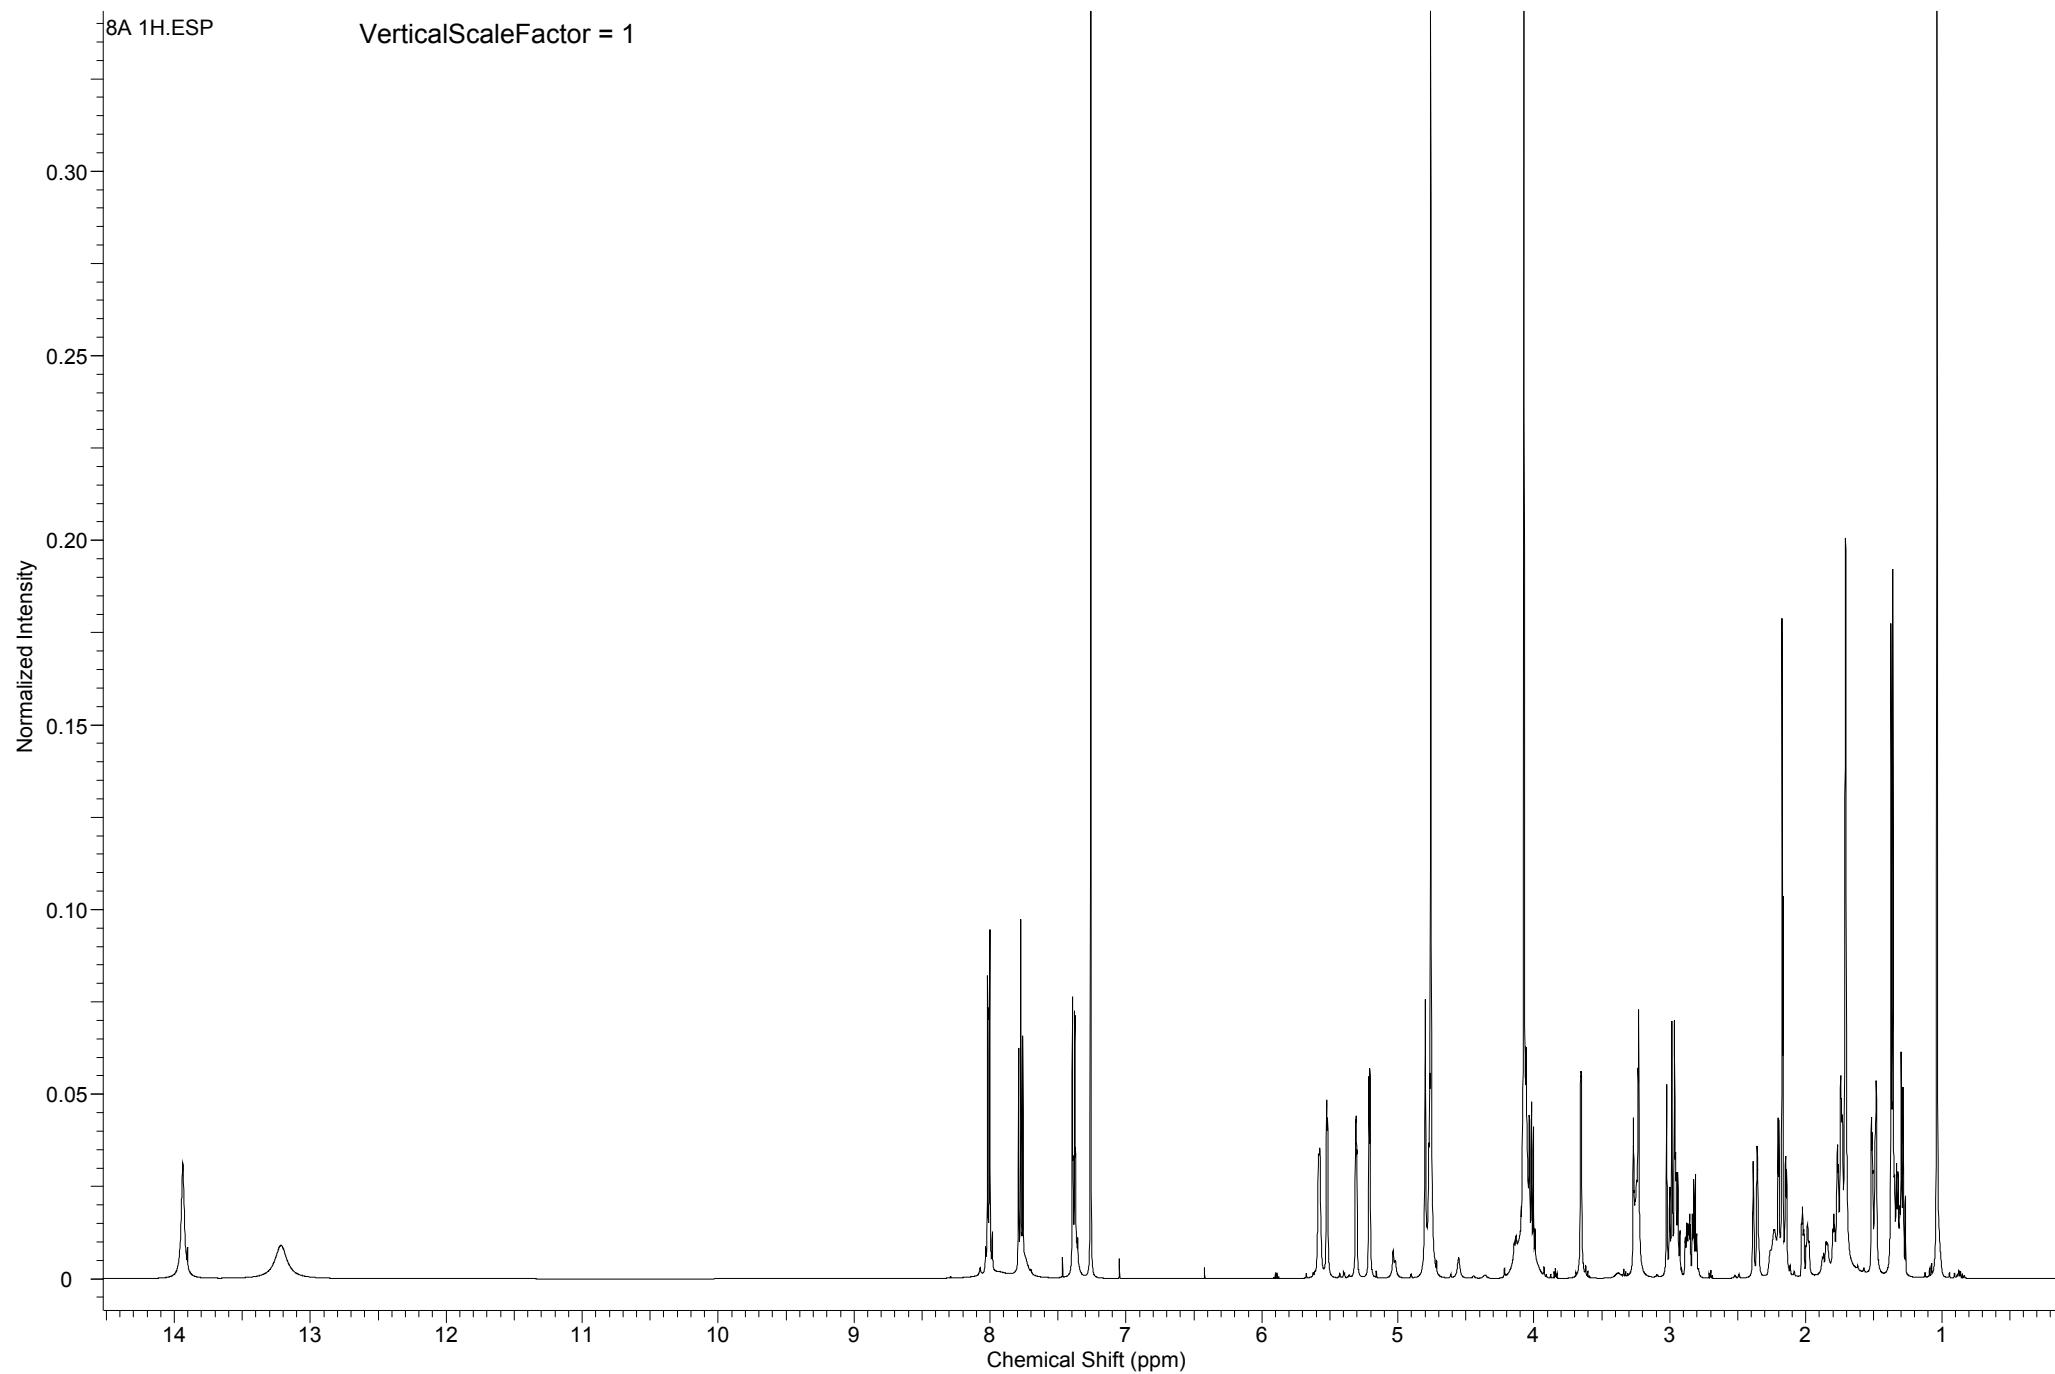



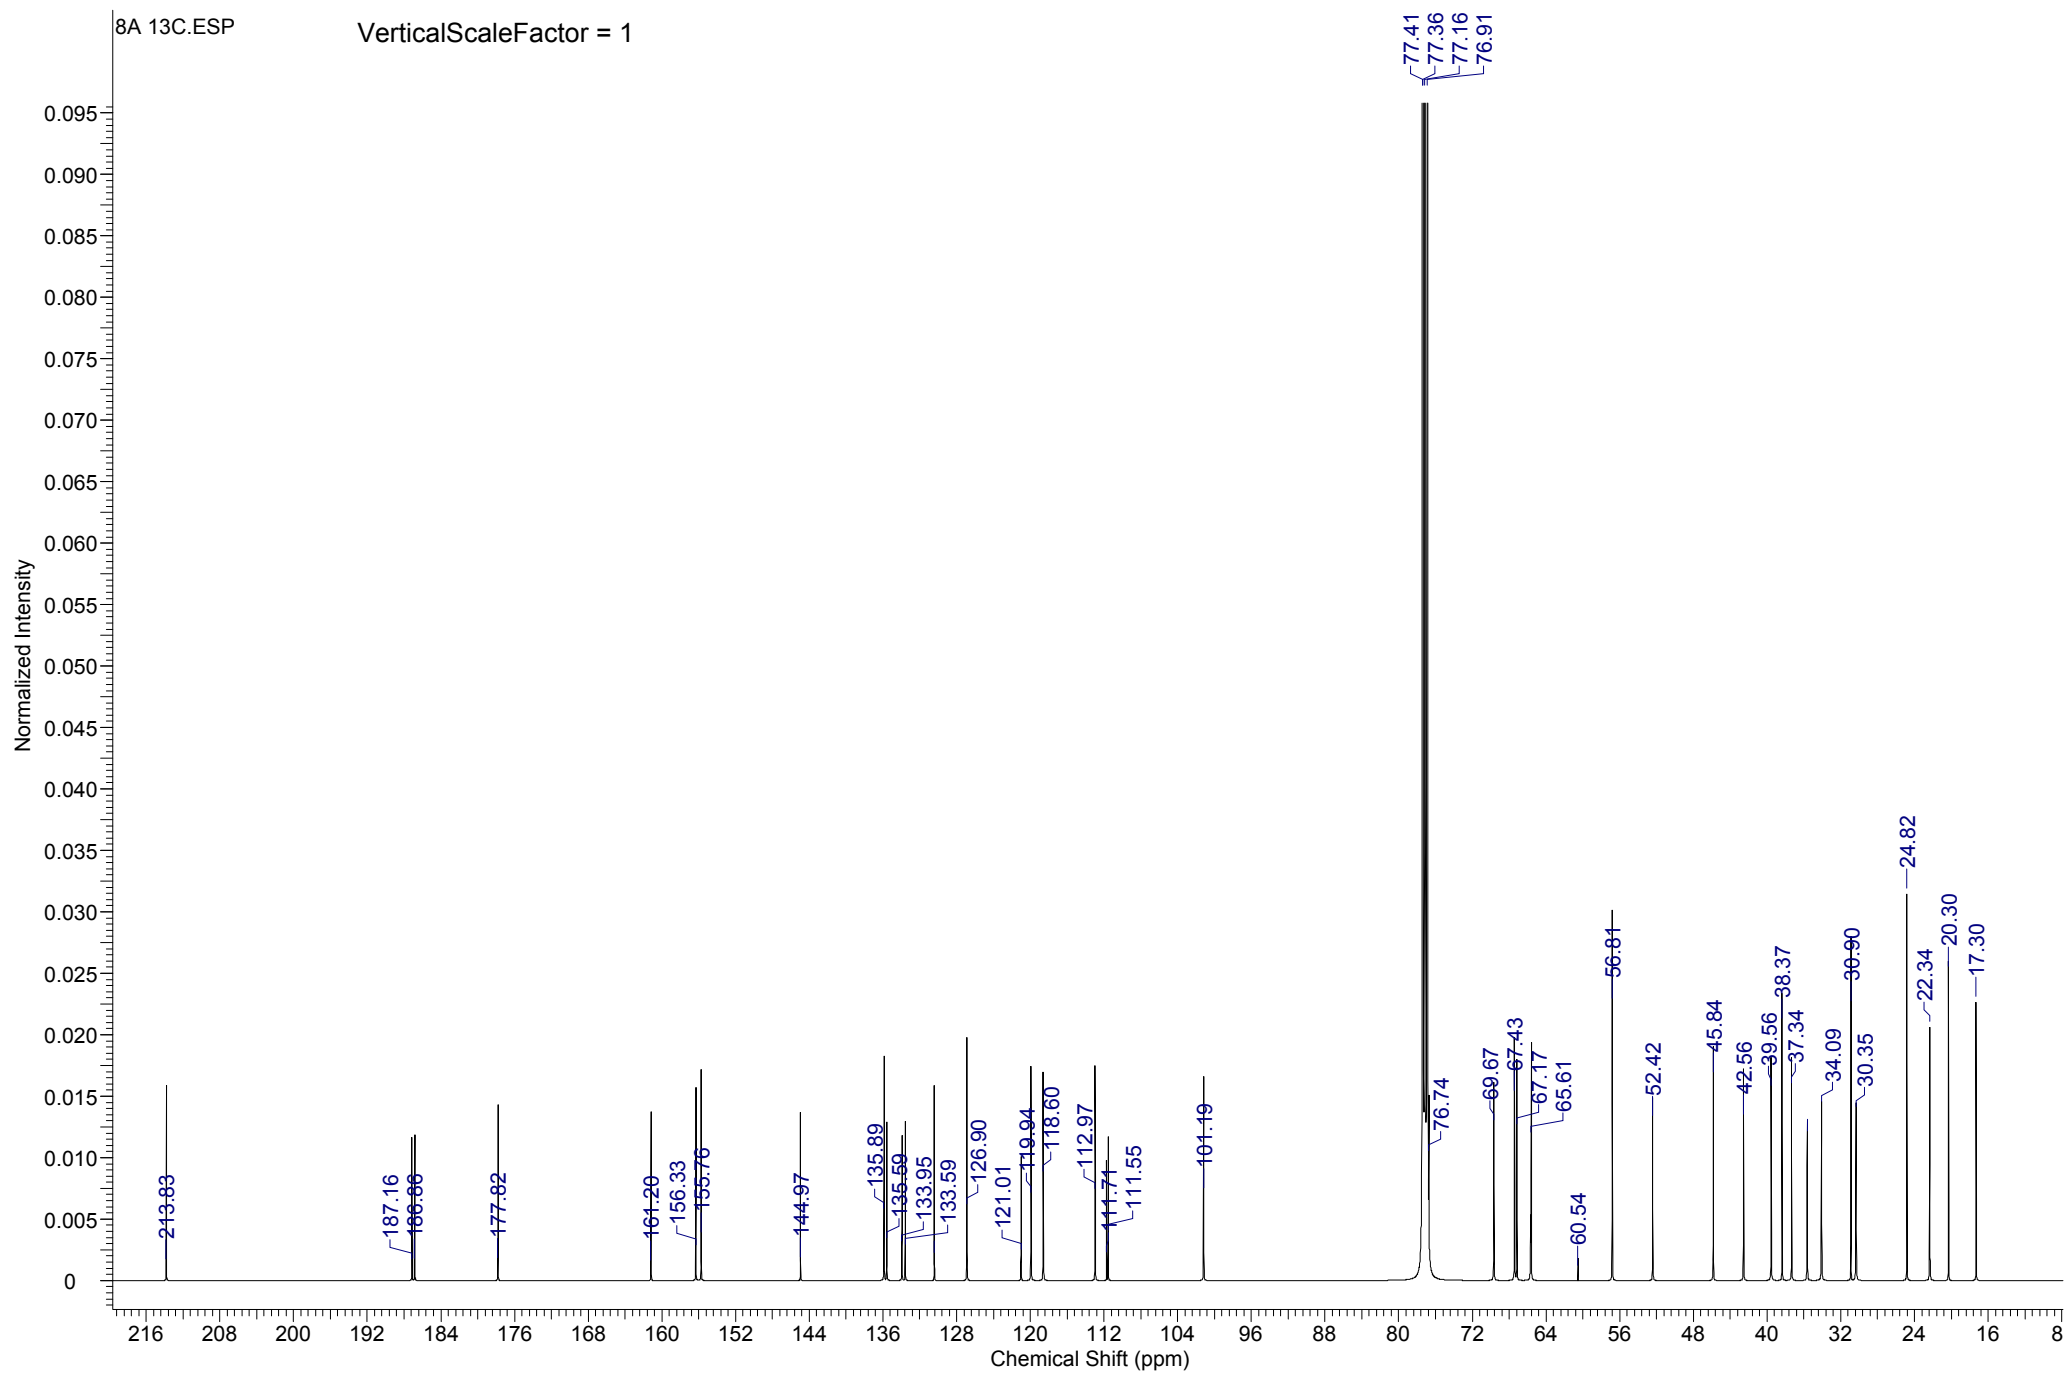

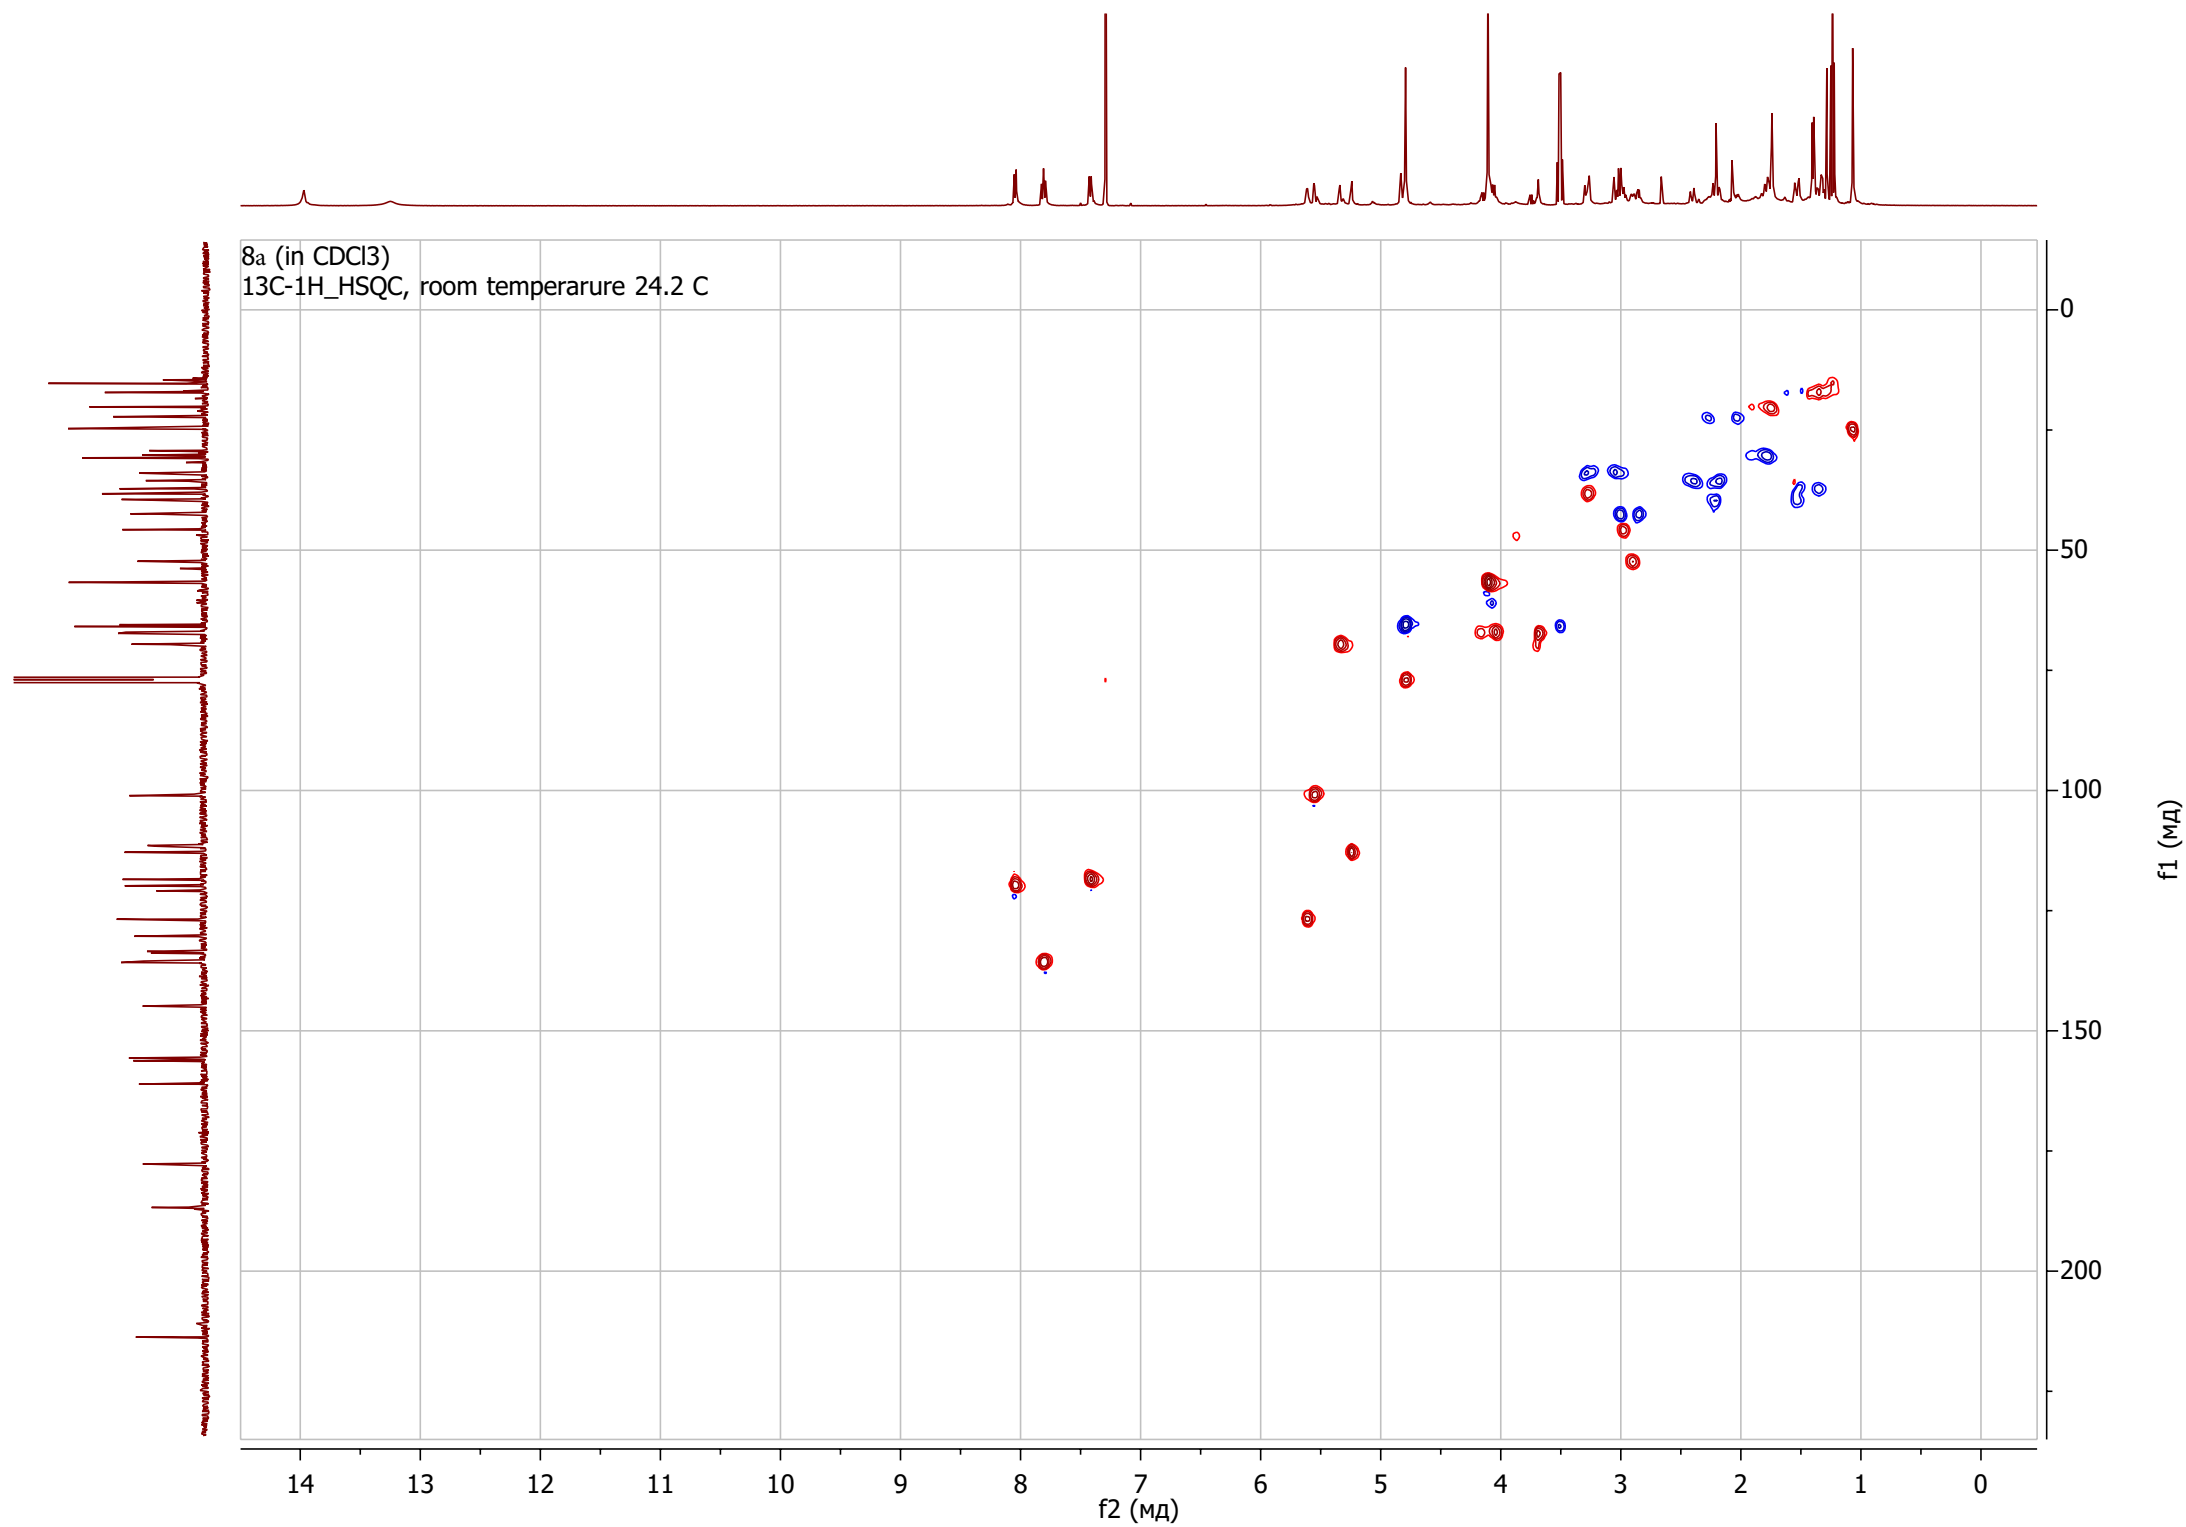

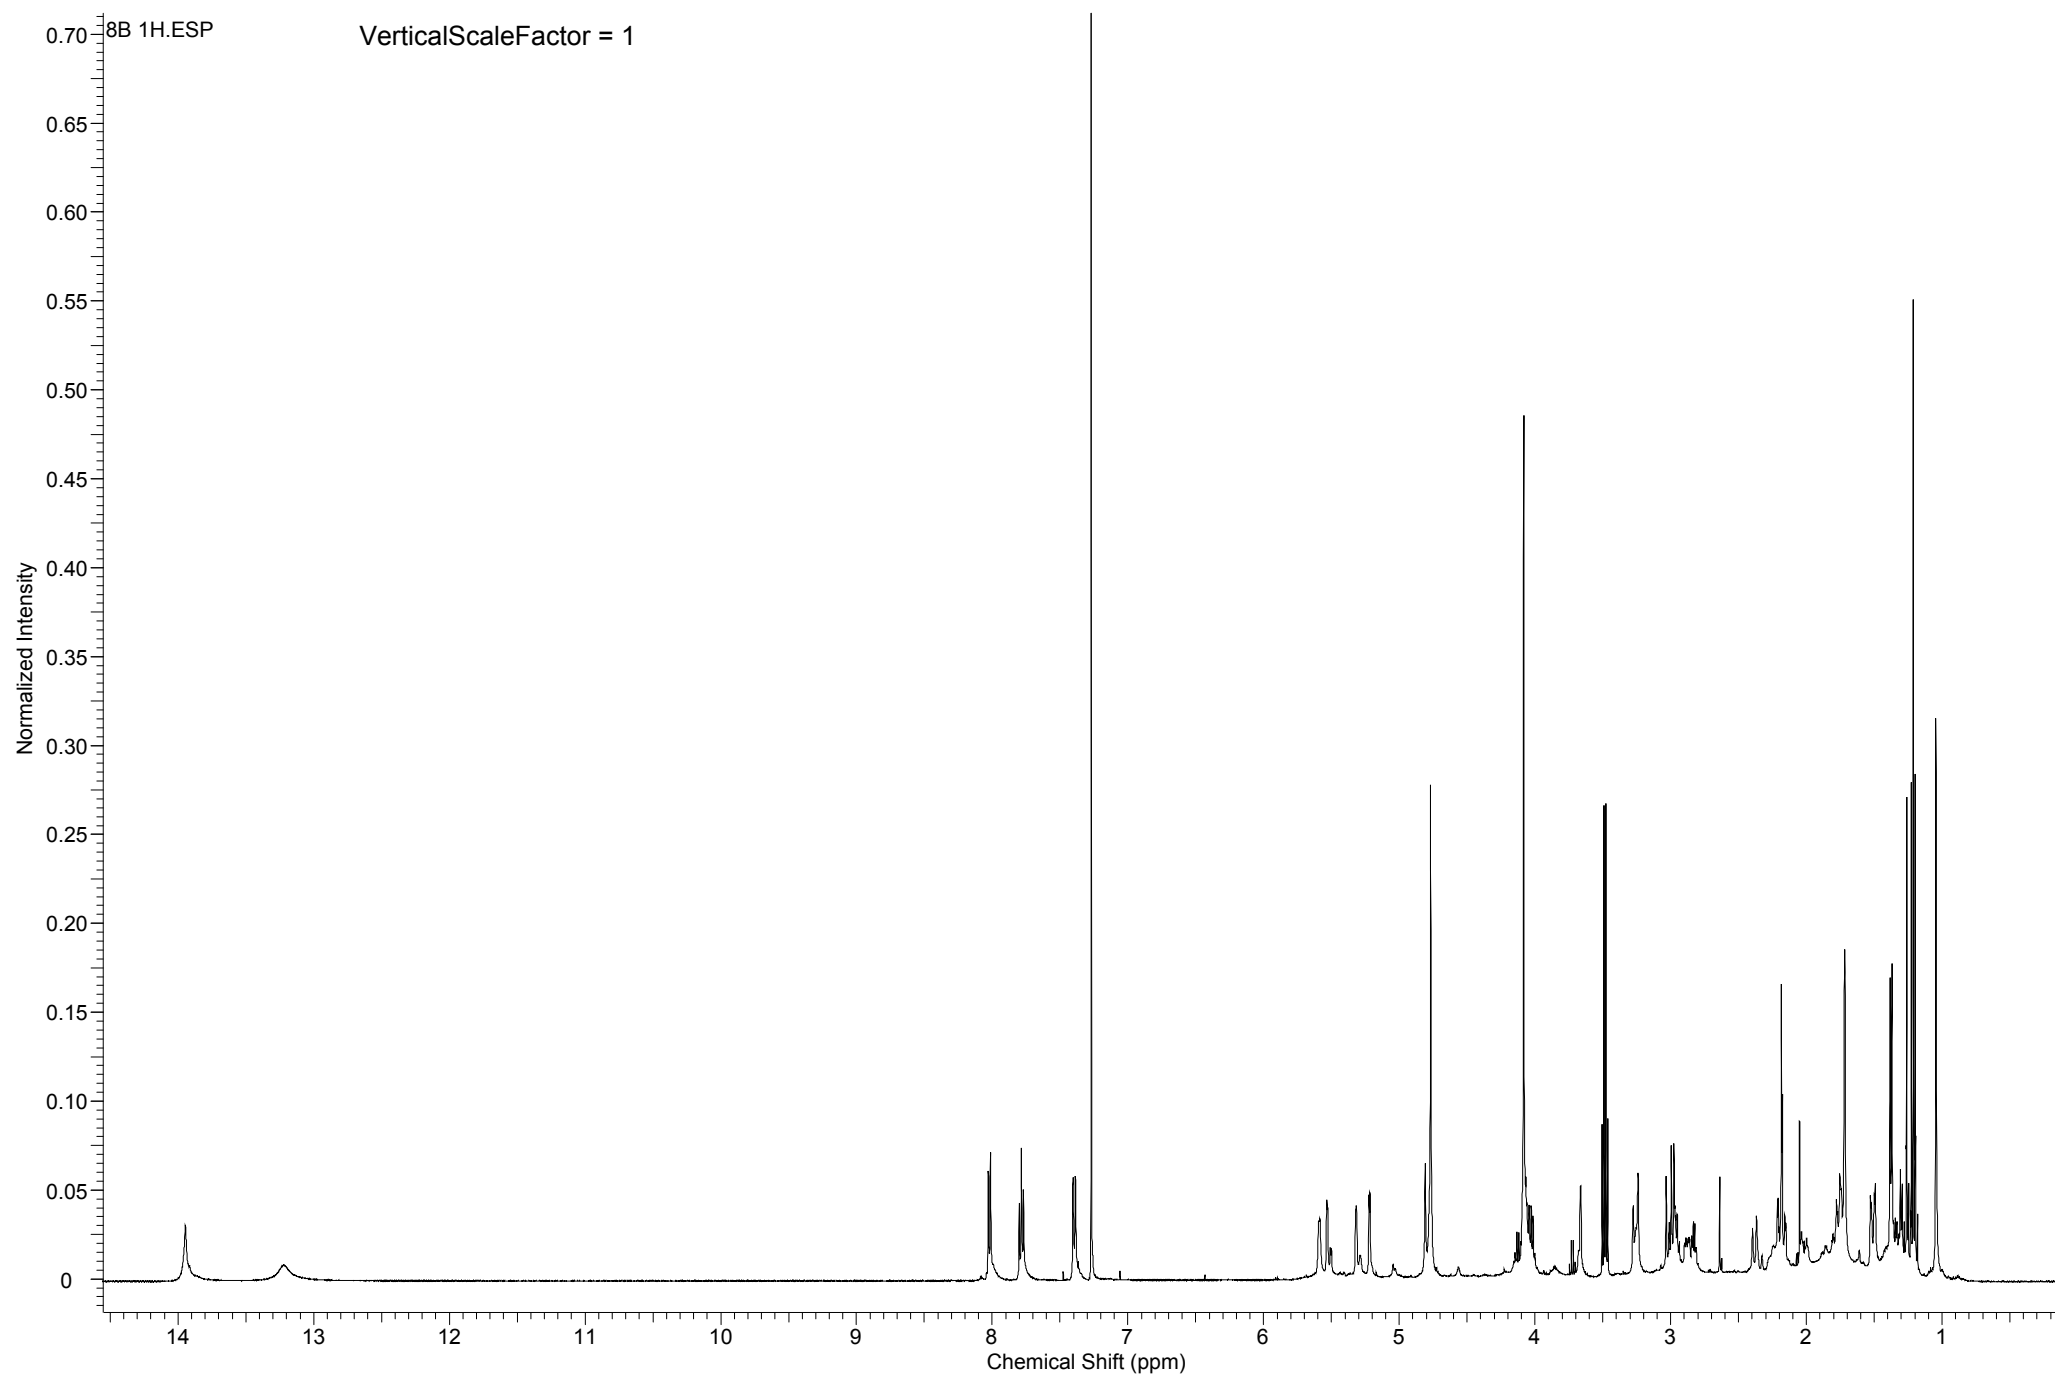

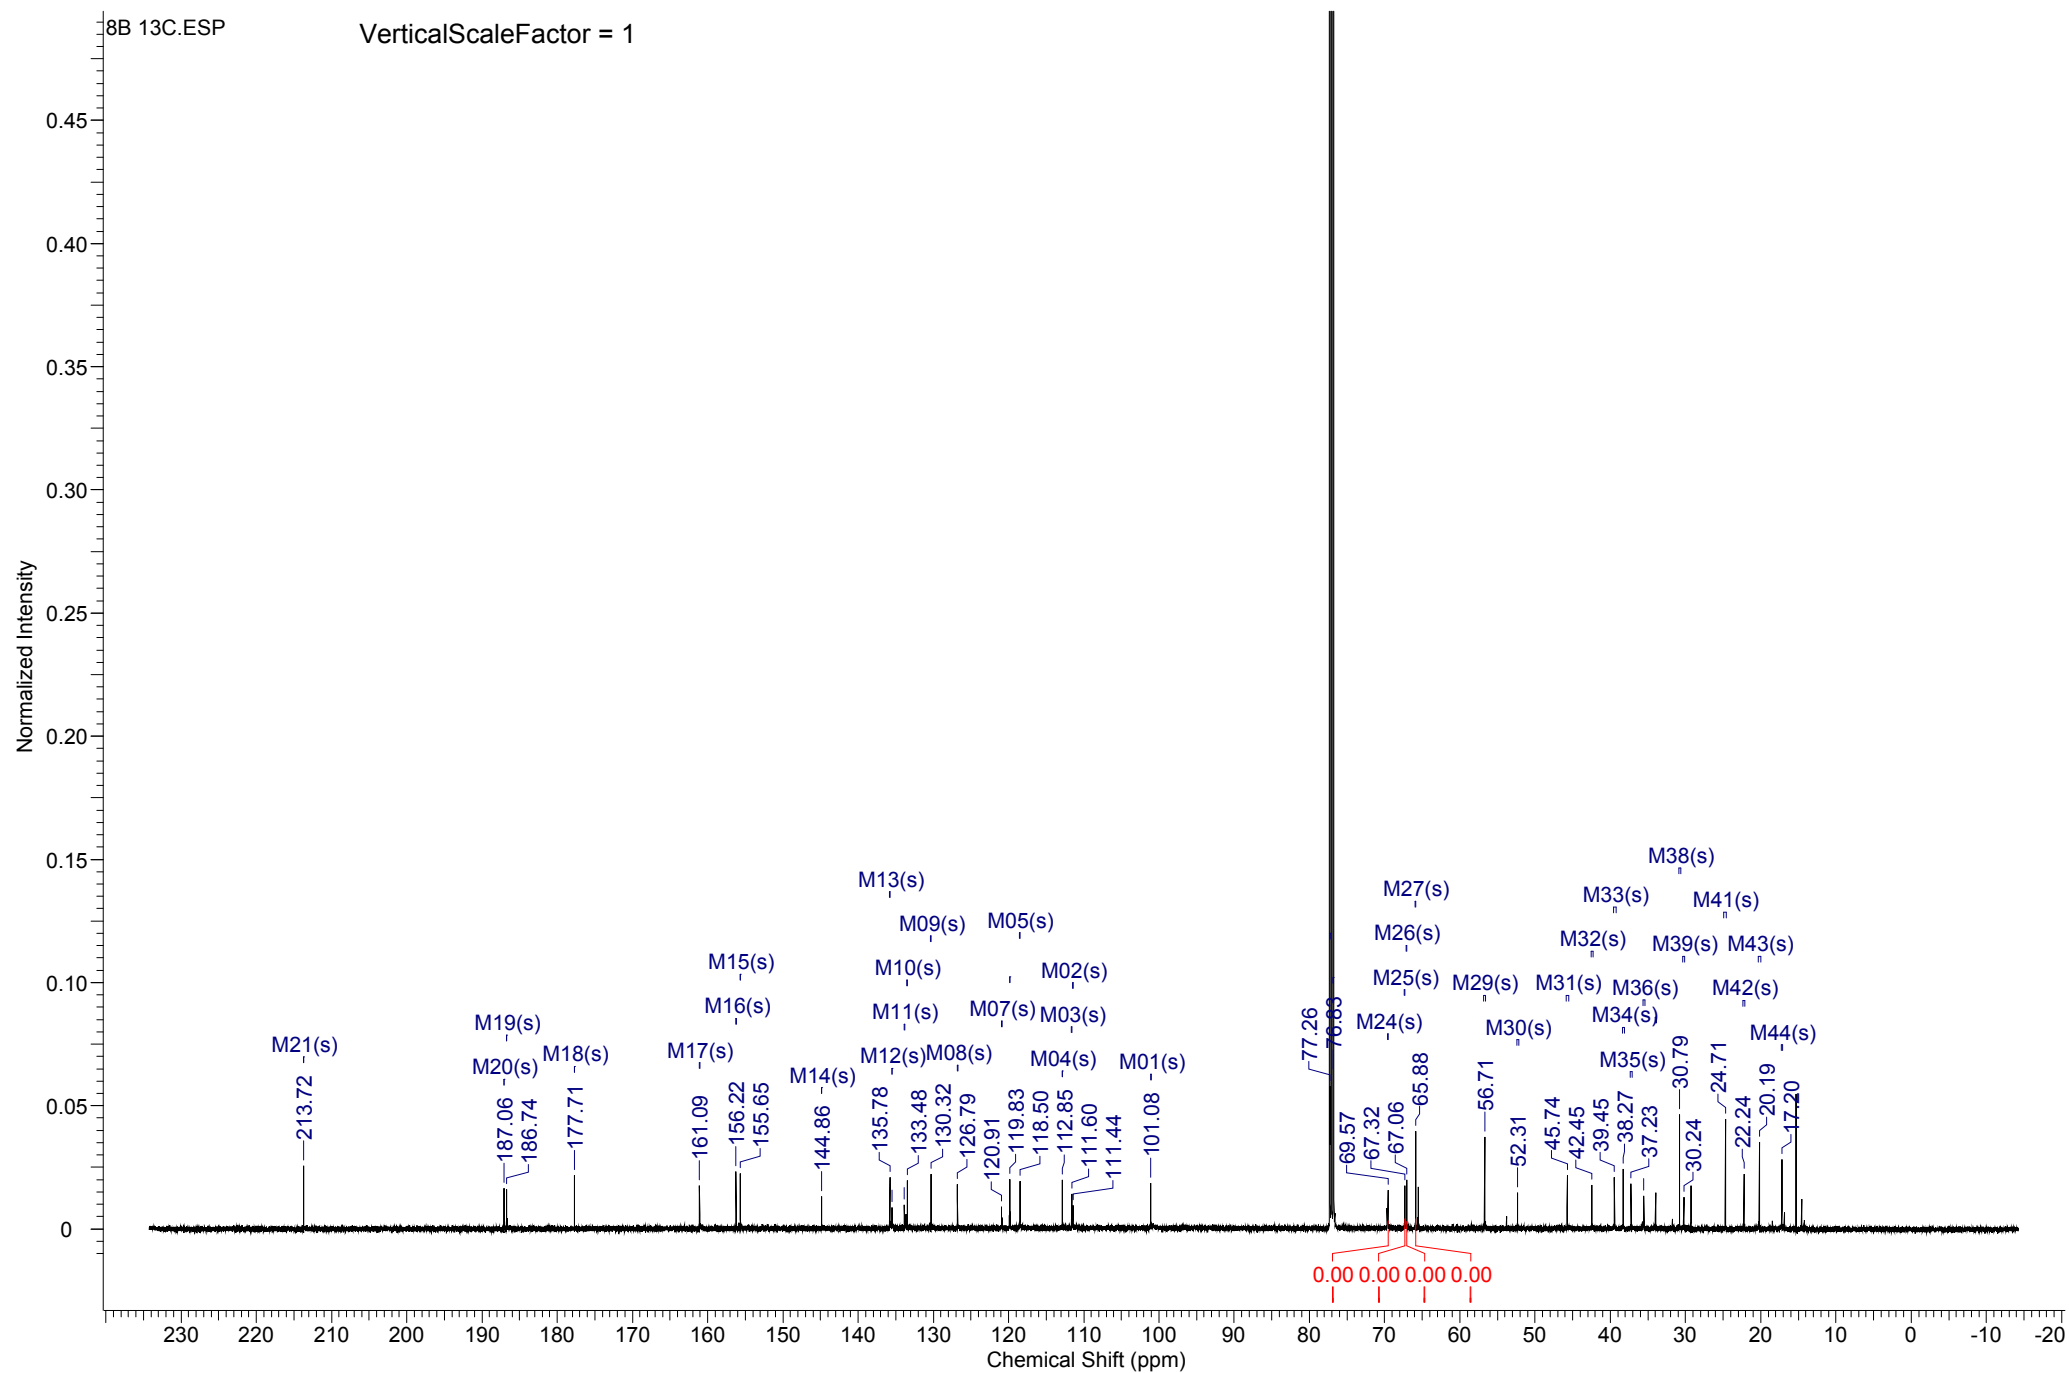

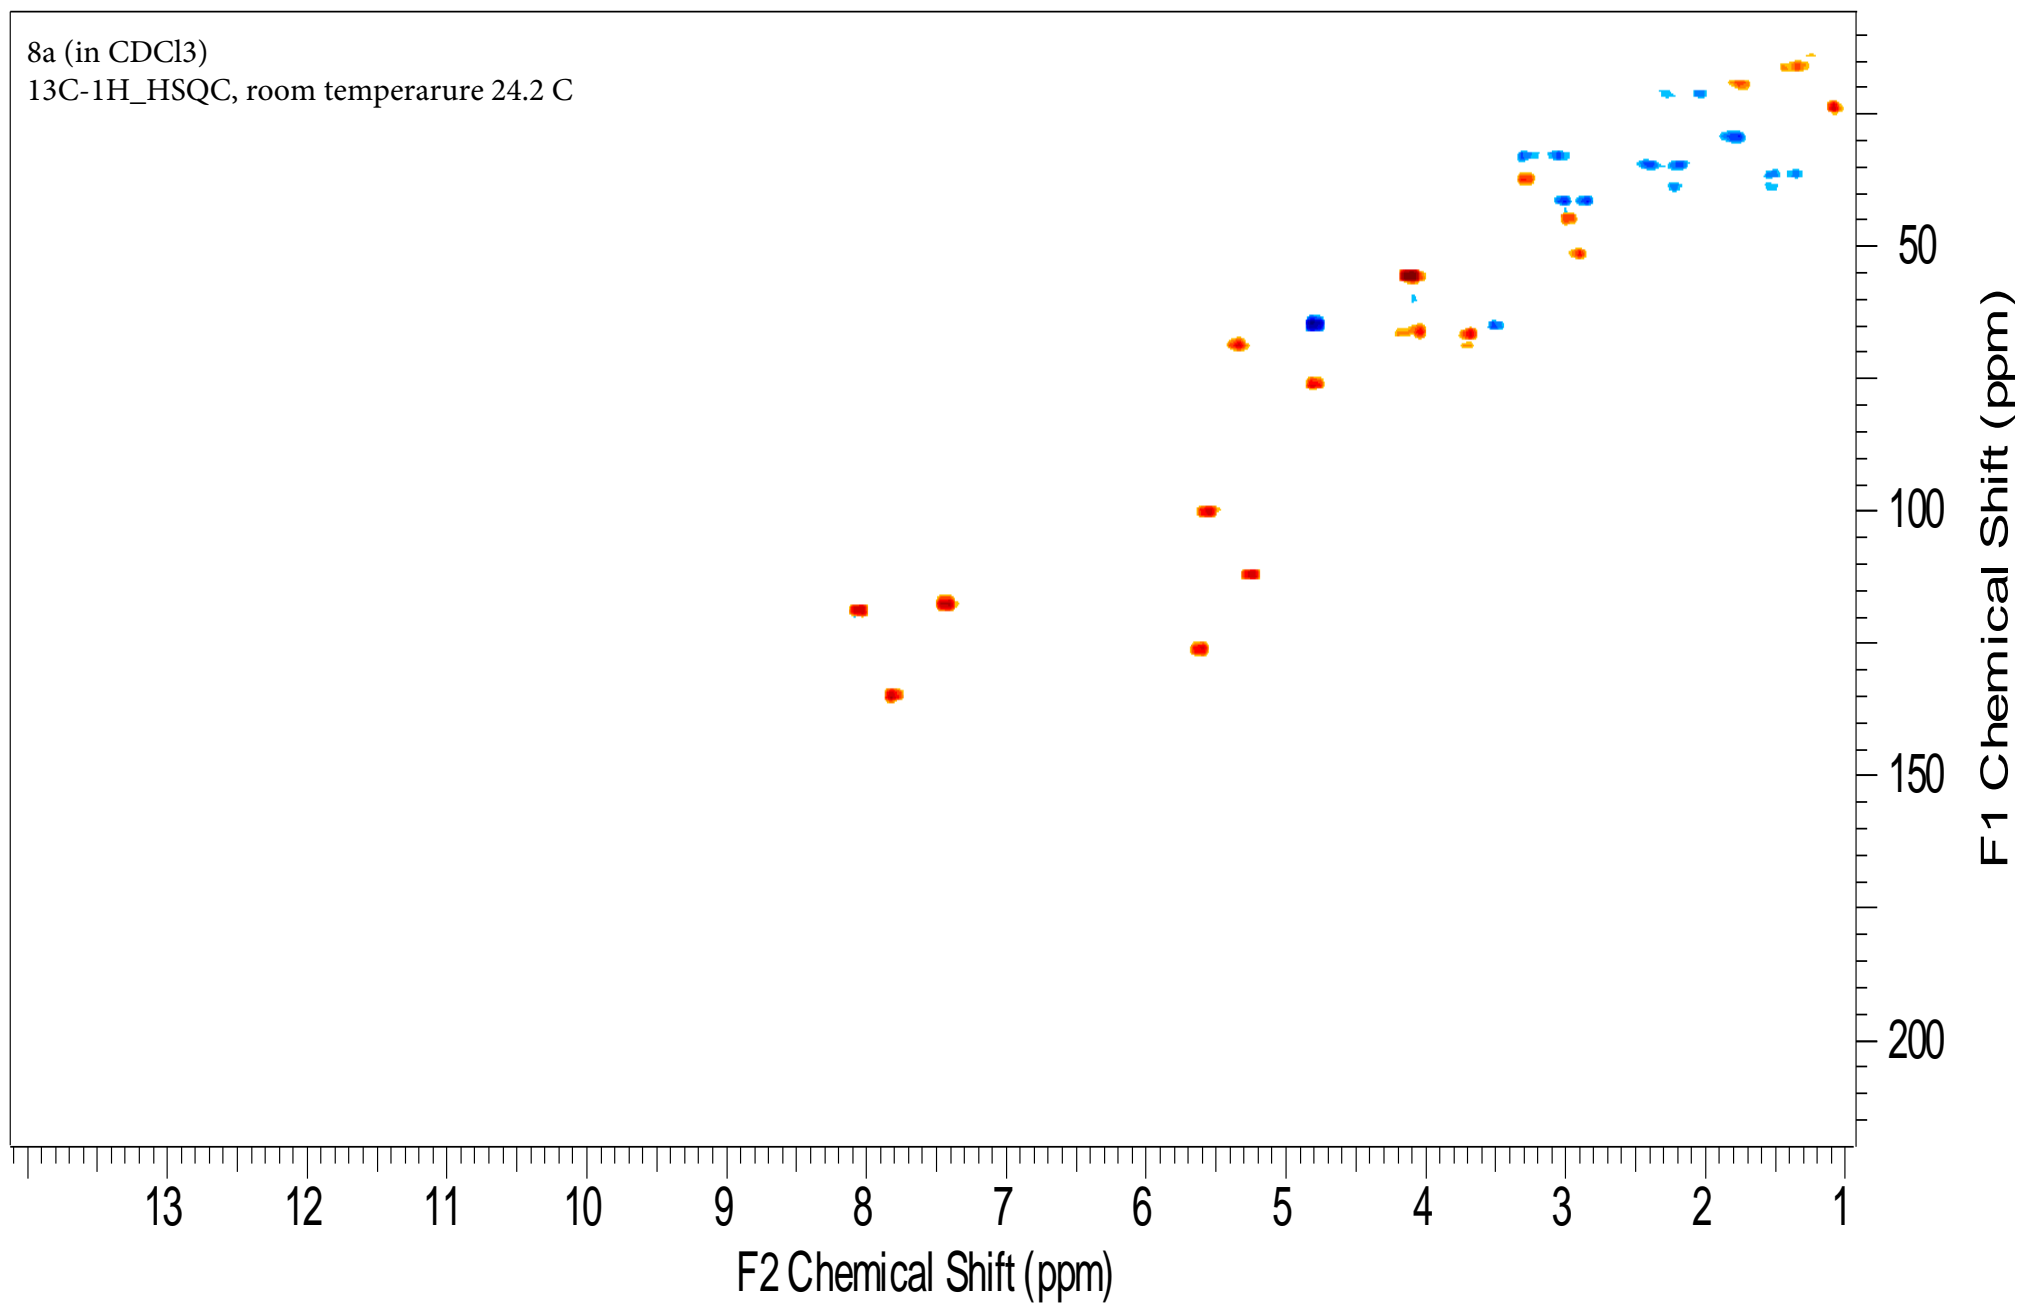

Supplement: s1 [file s1]
